# Supplementary material
Source: PubMed Central journal article supplement (PMC3947347)
Supplement: NIHMS525571-supplement-01.pdf [file NIHMS525571-supplement-01.pdf]

## SUPPLEMENTAL DATA

### Positional effects of AAN motifs in *rpoS* regulation by sRNAs and Hfq

Yi Peng<sup>1</sup>, Toby J. Soper<sup>1</sup>, and Sarah A. Woodson<sup>2\*</sup>

<sup>1</sup>CMDB Program and <sup>2</sup>T. C. Jenkins Department of Biophysics, Johns Hopkins University, 3400 N. Charles St., Baltimore, MD 21218 USA

#### Supplemental Figure Legends:

**Figure S1. Hfq binding of *rpoS301*  $\Delta 2$ -A18 fusions in vitro.** Hfq binding to variants of *rpoS301* RNA was measured by native gel mobility shift as described in Fig. 3. (A) to (E)  $\Delta 2$ -366A18,  $\Delta 2$ -441A18,  $\Delta 2$ -484A18,  $\Delta 2$ -499A18,  $\Delta 2$ -519A18. Left, Hfq titration of *rpoS* resolved on native 6% polyacrylamide gels in THEM<sub>2</sub>. Right, fraction of bound *rpoS* fit with partition functions.  $\Delta 2$ -366A18 and  $\Delta 2$ -441A18 formed two distinct RNP complexes corresponding to distal face interaction and a second unspecified site;  $\Delta 2$ -519A18 formed three RNP complexes corresponding to two specific interactions and additional nonspecific binding sites. By contrast,  $\Delta 2$ -441A18 formed only one distinct RNP complex corresponding to the first binding site ( $K_1$ ). The smear around the R•H2 position may result from the unstable second RNP band. Similarly,  $\Delta 2$ -484A18 formed the first RNP complex and a faint second RNP band at high [Hfq], corresponding to the first and nonspecific binding sites, respectively. Both binding experiments were fit to a partition function assuming two unequal independent binding sites. The  $K_d$  values are summarized in Table S1. For wt *rpoS301*, the standard deviation among trials is <0.02  $\mu$ M.

**Figure S2. DsrA annealing to *rpoS301*  $\Delta 2$ -A18 RNAs in vitro.** The annealing kinetics of DsrA and <sup>32</sup>P-labeled *rpoS301* RNAs was measured at 25 °C as described in Fig. 4. Gels were run continuously during the experiment so samples on the right traveled less far than those on the left. (A) to (F)  $\Delta 2$ ,  $\Delta 2$ -366A18,  $\Delta 2$ -441A18,  $\Delta 2$ -484A18,  $\Delta 2$ -499A18,  $\Delta 2$ -519A18. Left, DsrA annealing kinetics without Hfq. Center, DsrA annealing kinetics of *rpoS* with 0.6  $\mu$ M Hfq monomer. Right, fraction of bound *rpoS* fit with monophasic or biphasic rate equations. Note that with Hfq present,  $\Delta 2$  formed the R•D•H ternary complex in the marker lane (2 hr) but not over the reaction time course of 60 min, indicating that the ternary complex formation is extremely slow. By contrast, all the  $\Delta 2$ -A18 fusions formed the ternary complex very rapidly. However, the ternary complex collapsed into binary complex faster than for wt *rpoS301* (Fig. 4B), suggesting that it is less stable in the mutant RNAs. The  $k_{obs}$  values were summarized in Table S1. Reactions with no Hfq and for  $\Delta 2$  with Hfq were fit to eq. 3; all others were fit to eq. (4).

**Figure S3. Hfq binding of *rpoS301* single mutants in vitro.** Binding experiments to <sup>32</sup>P-labeled *rpoS301* RNA were performed as described in Fig. 3. (A) to (E)  $\Delta A_6$ ,  $\Delta(AAN)_4$ ,  $\Delta 484$ ,  $\Delta 499$ , and  $\Delta 519$ . Left, Hfq titration of *rpoS* resolved on native polyacrylamide gels. Right, fraction of bound *rpoS* fit to eq. (2). Higher molecular weight complexes were not resolved by the gel.  $\Delta A_6$  and  $\Delta(AAN)_4$  bind to Hfq more tightly than  $\Delta 484$ ,  $\Delta 499$ , and  $\Delta 519$ . Note that free  $\Delta A_6$ , free  $\Delta 499$ , and  $\Delta 519$  R•H complex migrated as two conformations. The  $K_d$  values are summarized in Table S1.

FIGURE S1

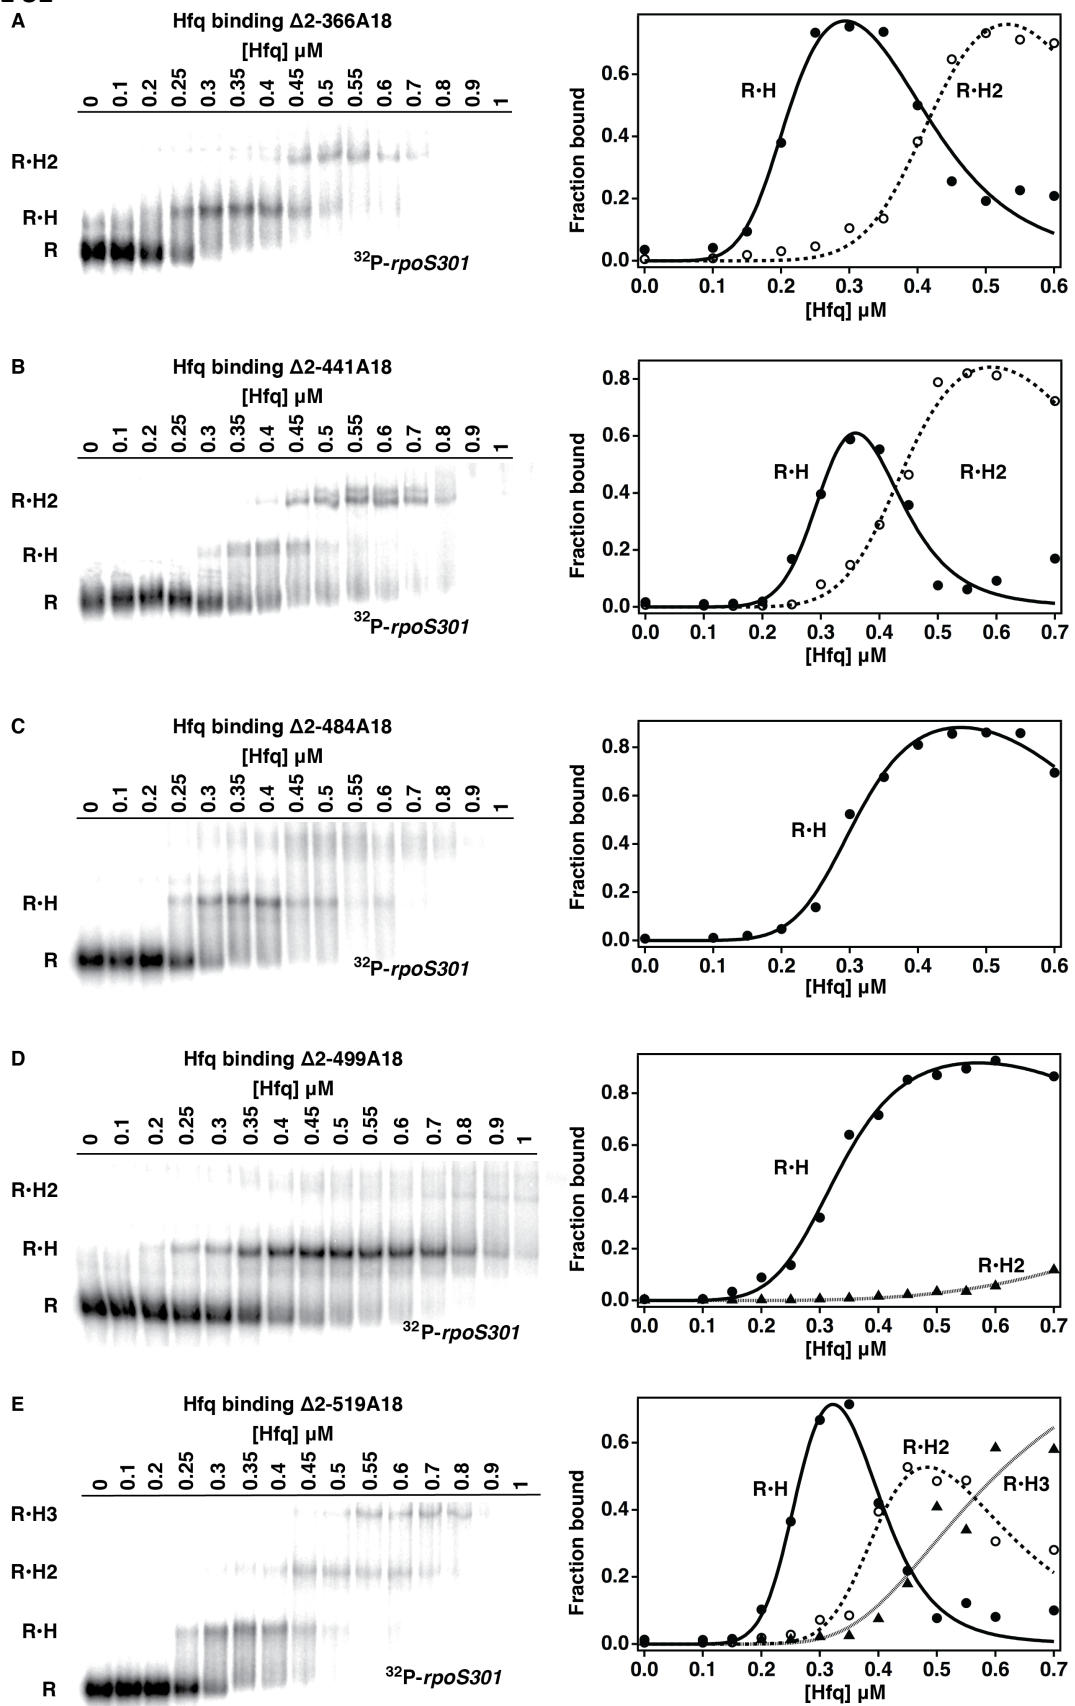

**FIGURE S2**

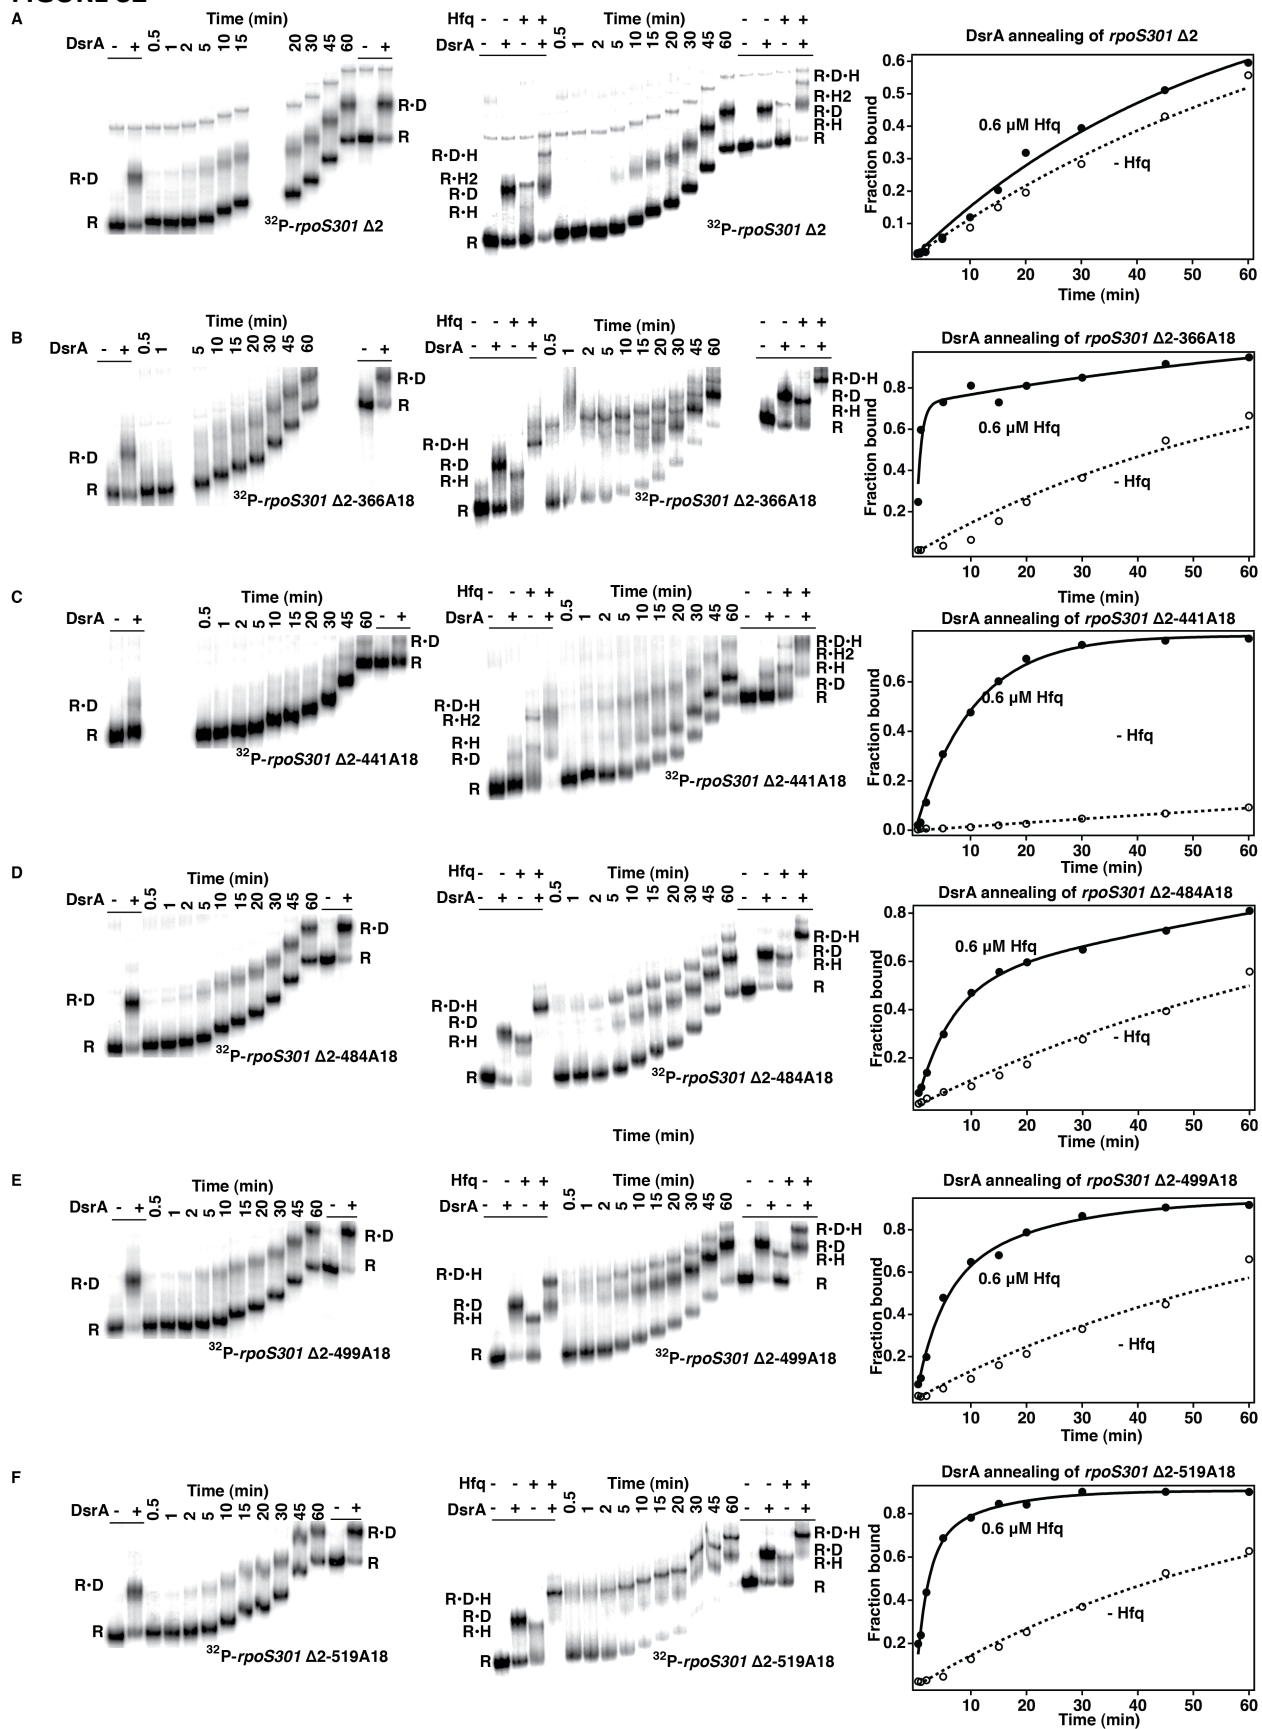

FIGURE S3

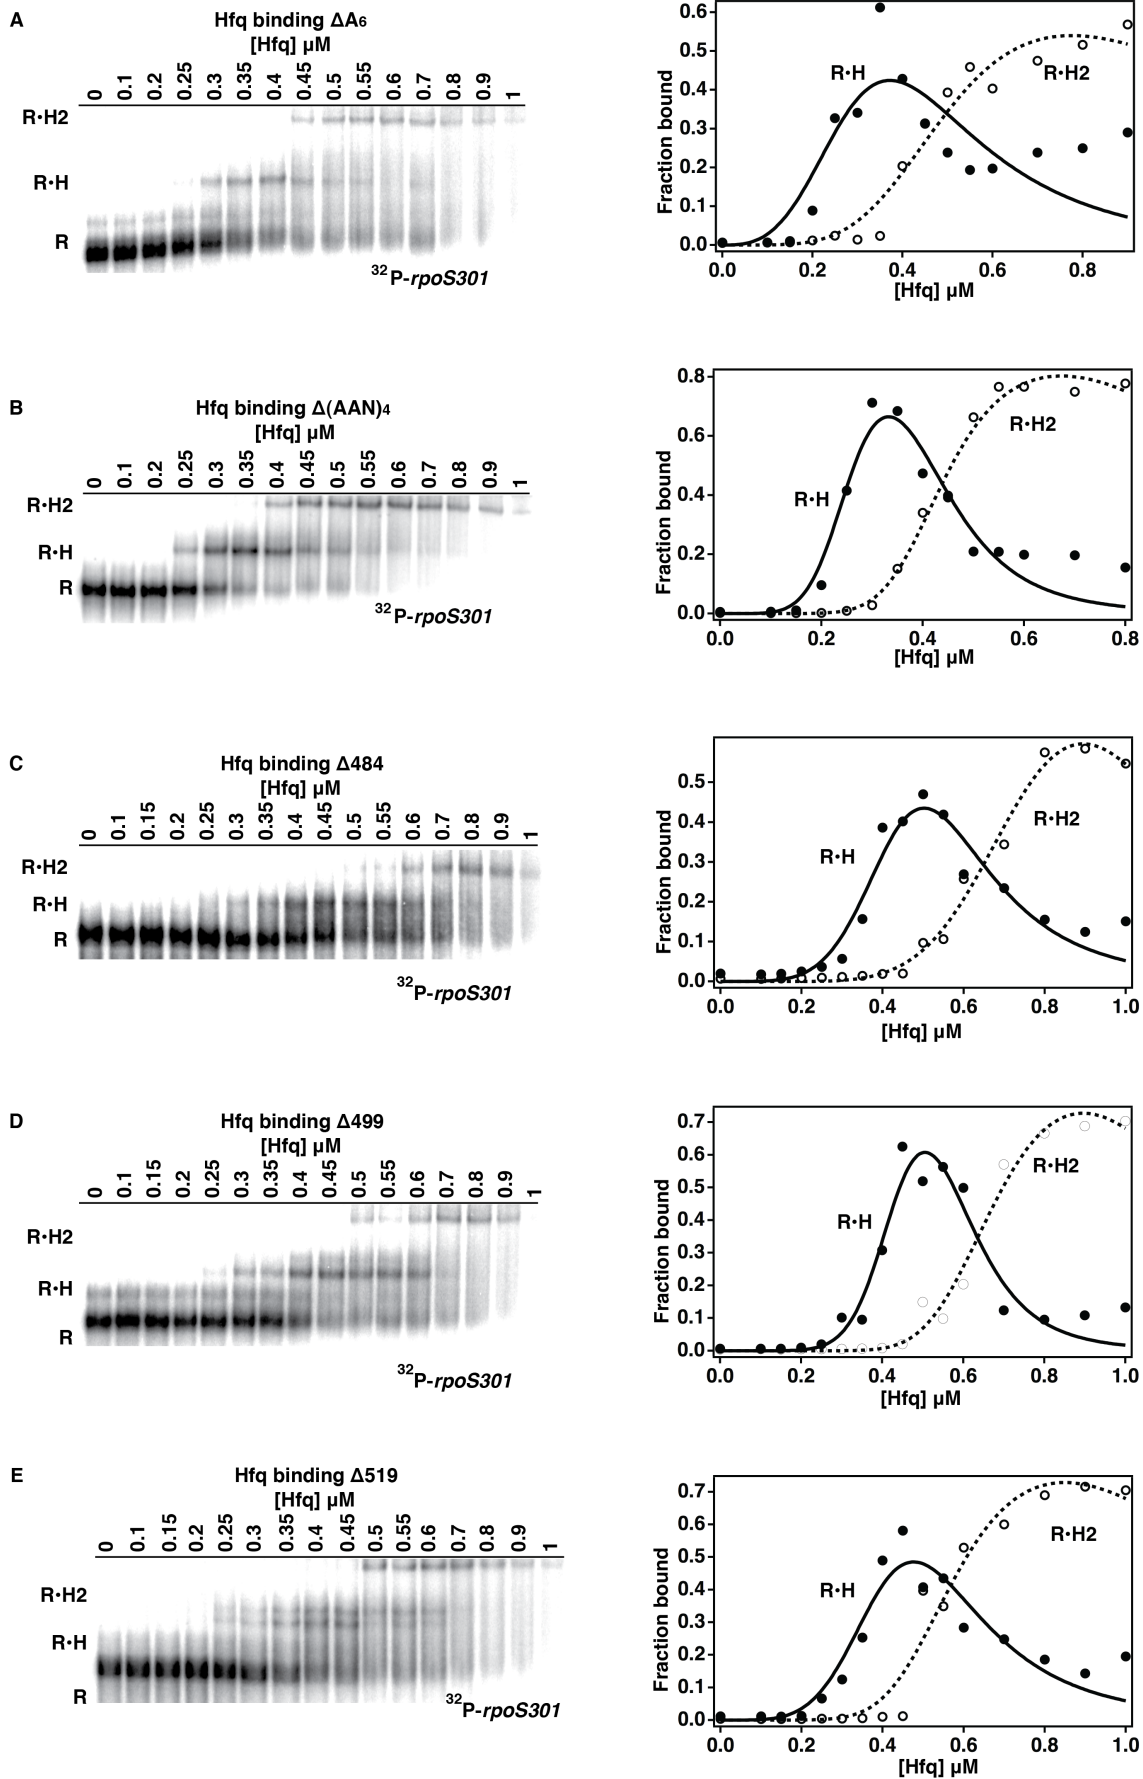

Table S1. Summary of *rpoS*•Hfq binding constants and *rpoS*•DsrA annealing rate

| <i>rpoS301</i>     | Hfq binding constant $K_d$ ( $\mu\text{M}$ ) |       |           | DsrA annealing rate $k_{obs}$ ( $\text{min}^{-1}$ ) |       |                  |
|--------------------|----------------------------------------------|-------|-----------|-----------------------------------------------------|-------|------------------|
|                    | $K_1$                                        | $K_2$ | $K_{nsp}$ | -Hfq                                                | +Hfq  | fold of increase |
| wt                 | 0.3                                          | 0.42  | 0.87      | 0.04                                                | 2.5   | 62.50            |
| $\Delta 2$         | -                                            | 0.4   | 0.74      | 0.012                                               | 0.018 | 1.50             |
| $\Delta 2$ -366A18 | 0.21                                         | 0.42  | 0.66      | 0.016                                               | 1.24  | 77.50            |
| $\Delta 2$ -441A18 | 0.31                                         | 0.44  | 0.78      | 0.0016                                              | 0.095 | 59.38            |
| $\Delta 2$ -484A18 | 0.31                                         | -     | 0.69      | 0.011                                               | 0.16  | 14.55            |
| $\Delta 2$ -499A18 | 0.33                                         | -     | 0.98      | 0.014                                               | 0.23  | 16.43            |
| $\Delta 2$ -519A18 | 0.27                                         | 0.39  | 0.6       | 0.016                                               | 0.49  | 30.63            |
| $\Delta A6$        | 0.33                                         | 0.43  | 1.04      |                                                     |       |                  |
| $\Delta(AAN)4$     | 0.26                                         | 0.42  | 1.06      |                                                     |       |                  |
| $\Delta 484$       | 0.46                                         | 0.55  | 1.07      |                                                     |       |                  |
| $\Delta 499$       | 0.44                                         | 0.59  | 1.17      |                                                     |       |                  |
| $\Delta 519$       | 0.41                                         | 0.55  | 1.25      |                                                     |       |                  |

The binding properties were measured by native polyacrylamide gel electrophoresis, as shown in Fig. 3 and 4, and Figs. S1, 2, and 3. The equations and calculations were described in Material and Methods.

Table S2. Primers used for mutagenesis and PCR amplification in this study

| Primer name        | Sequence (5' to 3', inserted or mutated sequences are highlighted) |
|--------------------|--------------------------------------------------------------------|
| 53A18F             | <b>AAAAAAAAAAAAAAAAAA</b> ACGGTCACAGCGCCTGTAACGG                   |
| 53A18R             | GGTCGCAGTTGGCTTGTGTTTCGGC                                          |
| 250A18F            | <b>AAAAAAAAAAAAAAAAAA</b> ATGGCCGCGTTGTTTATGCTGGTAACG              |
| 250A18R            | GCGGTCGCGATAATTGCCTGTCCTTTC                                        |
| 366A18F            | <b>AAAAAAAAAAAAAAAAAA</b> GTTAAGGCGGGGCAAAAATAGCG                  |
| 366A18R            | GGACCAGCATTGTGTCGTTATGG                                            |
| 441A18F            | <b>AAAAAAAAAAAAAAAAAA</b> TTTTGAAATTCGTTACAAGGGG                   |
| 441A18R            | GCAAGCGTGTTGAACTGGTTCC                                             |
| 484A18F            | <b>AAAAAAAAAAAAAAAAAA</b> GCCGCAGCGATAAATCGGCGG                    |
| 484A18R            | ACGCAGCGGGTTTACGGATTTCCCC                                          |
| 499A18F            | <b>AAAAAAAAAAAAAAAAAA</b> ATCGGCGGAACCAGGCTTTTGC                   |
| 499A18R            | CGCTGCGGCAAATAACGCAGCGGG                                           |
| 519A18F            | <b>AAAAAAAAAAAAAAAAAA</b> AGCTTGAATGTTCCGTCAAGGG                   |
| 519A18R            | GCCTGGTTCCGCCGATTTATCGC                                            |
| Δ484F              | <b>CCCCCGCCG</b> CAGCGATAAATCGGCGG                                 |
| Δ484R              | ACGCAGCGGGTTTACGGATTTCCCC                                          |
| Δ499F              | AT <b>GCGT</b> CGGCGGAACCAGGCTTTTGC                                |
| Δ499R              | CGCTGCGGCAAATAACGCAGCGGG                                           |
| Δ519F              | <b>CCCCGCTT</b> GAAATGTTCCGTCAAGGG                                 |
| Δ519R              | GCCTGGTTCCGCCGATTTATCGCTGCG                                        |
| Pbad-rpoS-F(1)     | ACCTGACGCTTTTTATCGCAACTCTACTGTTTCTCCATCGGGTGAACAGAGTGCTAAC         |
| lacZ-rpoS10aa-R(1) | TAACGCCAGGGTTTTCCAGTCACGACGTTGTAAAACGACATCATGAACTTTCA              |
| rpoS301F           | GCGTATTCTGACTCATAAGGTGGCTCC                                        |
| rpoS576R(1)        | GTGTAATACGACTCACTATAGGGTGAACGATTATCATCAAACATAATG                   |
|                    | AATTCTGACTCATAAGGTGGCTCCTACC                                       |

(1) Soper, T., Mandin, P., Majdalani, N., Gottesman, S. & Woodson, S.A. 2010, "Positive regulation by small RNAs and the role of Hfq", *Proceedings of the National Academy of Sciences of the United States of America*, vol. 107, no. 21, pp. 9602-9607.

Table S3. Strains and plasmids used in this study

| Strain or plasmid name | Description                                                                                                          |
|------------------------|----------------------------------------------------------------------------------------------------------------------|
| PM1205(1)              | MG1655 <i>mal::lacI<sup>q</sup></i> , $\Delta$ araBAD, <i>lacI::PBAD-cat-sacB:lacZ</i> , <i>miniλtet<sup>R</sup></i> |
| TSdelAdel6(2)          | PM1205 <i>lacI::PBAD-rpoS-Δ(AAN)4ΔA6:lacZ</i>                                                                        |
| TS576(2)               | PM1205 <i>lacI::PBAD-rpoS-Δ(AAN)4:lacZ</i>                                                                           |
| TSdel6(2)              | PM1205 <i>lacI::PBAD-rpoS-ΔA6:lacZ</i>                                                                               |
| PY1230                 | PM1205 <i>lacI::PBAD-rpoS-Δ(AAN)4ΔA6-53A18:lacZ</i>                                                                  |
| PY1231                 | PM1205 <i>lacI::PBAD-rpoS-Δ(AAN)4ΔA6-250A18:lacZ</i>                                                                 |
| PY1203                 | PM1205 <i>lacI::PBAD-rpoS-Δ(AAN)4ΔA6-366A18:lacZ</i>                                                                 |
| PY1202                 | PM1205 <i>lacI::PBAD-rpoS-Δ(AAN)4ΔA6-441A18:lacZ</i>                                                                 |
| PY1201                 | PM1205 <i>lacI::PBAD-rpoS-Δ(AAN)4ΔA6-484A18:lacZ</i>                                                                 |
| PY1232                 | PM1205 <i>lacI::PBAD-rpoS-Δ(AAN)4ΔA6-499A18:lacZ</i>                                                                 |
| PY1233                 | PM1205 <i>lacI::PBAD-rpoS-Δ(AAN)4ΔA6-519A18:lacZ</i>                                                                 |
| PM1552(2)              | TS576 <i>hfq::cat</i>                                                                                                |
| PM1556(2)              | TSdelAdel6 <i>hfq::cat</i>                                                                                           |
| PY1213                 | PY1203 <i>hfq::cat</i>                                                                                               |
| PY1212                 | PY1202 <i>hfq::cat</i>                                                                                               |

|                 |                                                                                                                      |
|-----------------|----------------------------------------------------------------------------------------------------------------------|
| PY1211          | PY1201 <i>hfg::cat</i>                                                                                               |
| PY1204          | PM1205 <i>lacI'::PBAD-rpoS-Δ484:lacZ</i>                                                                             |
| PY1237          | PM1205 <i>lacI'::PBAD-rpoS-Δ499:lacZ</i>                                                                             |
| PY1208          | PM1205 <i>lacI'::PBAD-rpoS-Δ519:lacZ</i>                                                                             |
| PY1238          | PM1205 <i>lacI'::PBAD-rpoS-499A18:lacZ</i>                                                                           |
| PY1239          | PM1205 <i>lacI'::PBAD-rpoS-519A18:lacZ</i>                                                                           |
| pRpoS576(3)     | Topo based template containing full-length rpoS                                                                      |
| pRpoSDA6(2)     | Topo based template containing full-length rpoS with A6 mutation                                                     |
| pRpoSDAAYAA(2)  | Topo based template containing full-length rpoS with (AAN) <sub>4</sub> mutation                                     |
| pRpoS-HBM(2)    | Topo based template containing full-length rpoS with A6(AAN) <sub>4</sub> mutation                                   |
| pRpoS-Δ2-53A18  | Topo based template containing full-length rpoS with A6(AAN) <sub>4</sub> mutation and A18 insertion at position 53  |
| pRpoS-Δ2-250A18 | Topo based template containing full-length rpoS with A6(AAN) <sub>4</sub> mutation and A18 insertion at position 250 |
| pRpoS-Δ2-366A18 | Topo based template containing full-length rpoS with A6(AAN) <sub>4</sub> mutation and A18 insertion at position 366 |
| pRpoS-Δ2-441A18 | Topo based template containing full-length rpoS with A6(AAN) <sub>4</sub> mutation and A18 insertion at position 441 |
| pRpoS-Δ2-484A18 | Topo based template containing full-length rpoS with A6(AAN) <sub>4</sub> mutation and A18 insertion at position 484 |
| pRpoS-Δ2-499A18 | Topo based template containing full-length rpoS with A6(AAN) <sub>4</sub> mutation and A18 insertion at position 499 |
| pRpoS-Δ2-519A18 | Topo based template containing full-length rpoS with A6(AAN) <sub>4</sub> mutation and A18 insertion at position 519 |



|                 |                                                                                            |
|-----------------|--------------------------------------------------------------------------------------------|
| pRpoS-Δ484      | Topo based template containing full-length rpoS with U-rich motif mutation at position 484 |
| pRpoS-Δ499      | Topo based template containing full-length rpoS with A-rich motif mutation at position 499 |
| pRpoS-Δ519      | Topo based template containing full-length rpoS with U-rich motif mutation at position 519 |
| pRpoS-wt-499A18 | Topo based template containing full-length rpoS with A18 insertion at position 499         |
| pRpoS-wt-519A18 | Topo based template containing full-length rpoS with A18 insertion at position 519         |
| pBRplac(4)      | Amp <sup>r</sup> , Plac promoter based expression vector                                   |
| pDsrA(2)        | AatII-EcoRI DsrA-containing fragment cloned into pBR-plac                                  |
| pRprA (2)       | AatII-EcoRI RprA-containing fragment cloned into pBR-plac                                  |
| pArcZ (2)       | AatII-EcoRI ArcZ-containing fragment cloned into pBR-plac                                  |
| pUCT7DsrA-U6    | pUC18 based DsrA with extended 3' U6 template with DraI linearization site                 |

- 
- (1) Mandin, P. & Gottesman, S. 2009, "A genetic approach for finding small RNAs regulators of genes of interest identifies RybC as regulating the DpiA/DpiB two-component system", *Molecular microbiology*, vol. 72, no. 3, pp. 551-565.
- (2) Soper, T., Mandin, P., Majdalani, N., Gottesman, S. & Woodson, S.A. 2010, "Positive regulation by small RNAs and the role of Hfq", *Proceedings of the National Academy of Sciences of the United States of America*, vol. 107, no. 21, pp. 9602-9607.
- (3) Soper, T.J. & Woodson, S.A. 2008, "The rpoS mRNA leader recruits Hfq to facilitate annealing with DsrA sRNA", *RNA (New York, N.Y.)*, vol. 14, no. 9, pp. 1907-1917.
- (4) Guillier, M. & Gottesman, S. 2006, "Remodelling of the Escherichia coli outer membrane by two small regulatory RNAs", *Molecular microbiology*, vol. 59, no. 1, pp. 231-247.
